1 **Dysregulation of the PRUNE2/PCA3 genetic axis in human prostate**  
2 **cancer: From experimental discovery to validation in two**  
3 **independent patient cohorts**

4  
5 **Richard C. Lauer,<sup>1,2,\*</sup> Marc Barry,<sup>3,\*</sup> Tracey L. Smith,<sup>4,5</sup> Andrew Maltez Thomas,<sup>6,15,‡</sup> Jin**  
6 **Wu,<sup>1,7</sup> Ruofei Du,<sup>8</sup> Ji-Hyun Lee,<sup>9,10</sup> Arpit Rao,<sup>11</sup> Andrey S. Dobroff,<sup>1,12</sup> Marco A. Arap,<sup>13,14</sup>**  
7 **Diana N. Nunes,<sup>15</sup> Israel T. Silva,<sup>16</sup> Emmanuel Dias-Neto,<sup>15</sup> Isan Chen,<sup>17</sup>**  
8 **Dennis J. McCance,<sup>1,7</sup> Webster K. Cavenee,<sup>18</sup> Renata Pasqualini,<sup>4,5,†</sup> and Wadih Arap,<sup>4,19,†</sup>**  
9

10 <sup>1</sup>University of New Mexico Comprehensive Cancer Center, Albuquerque, New Mexico, USA.

11 <sup>2</sup>Division of Hematology/Oncology, Department of Internal Medicine, University of New  
12 Mexico School of Medicine, Albuquerque, New Mexico, USA.

13 <sup>3</sup>Department of Pathology, University of Utah, Salt Lake City, Utah, USA.

14 <sup>4</sup>Rutgers Cancer Institute of New Jersey, Newark, New Jersey, USA.

15 <sup>5</sup>Division of Cancer Biology, Department of Radiation Oncology, Rutgers New Jersey Medical  
16 School, Newark, New Jersey, USA.

17 <sup>6</sup>Department of Biochemistry, Institute of Chemistry, University of São Paulo, São Paulo, SP,  
18 Brazil.

19 <sup>7</sup>Department of Pathology, University of New Mexico, Albuquerque, New Mexico, USA.

20 <sup>8</sup>Department of Biostatistics, University of Arkansas for Medical Sciences, Little Rock,  
21 Arkansas, USA.

22 <sup>9</sup>Department of Biostatistics, University of Florida, Gainesville, Florida, USA.

23 <sup>10</sup>Division of Quantitative Sciences, University of Florida Health Cancer Center, Gainesville,  
24 Florida, USA.

25 <sup>11</sup>Section of Hematology and Oncology, Department of Medicine, Baylor College of Medicine,  
26 Houston, Texas, USA.

27 <sup>12</sup>Division of Molecular Medicine, Department of Medicine, Albuquerque, New Mexico, USA.

28 <sup>13</sup>Division of Urology, University of São Paulo Medical School, São Paulo, Brazil.

29 <sup>14</sup>Syrian-Lebanese Hospital, São Paulo, São Paulo, Brazil.

30 <sup>15</sup>Laboratory of Medical Genomics, A.C. Camargo Cancer Center, São Paulo, São Paulo, Brazil.

31 <sup>16</sup>Laboratory of Bioinformatics and Computational Biology, A.C. Camargo Cancer Center, São  
32 Paulo, São Paulo, Brazil.

33 <sup>17</sup>MBrace Therapeutics, San Diego, California, USA.

34 <sup>18</sup>Ludwig Institute for Cancer Research, University of California-San Diego, La Jolla, California,  
35 USA.

36 <sup>19</sup>Division of Hematology/Oncology, Department of Medicine, Rutgers New Jersey Medical  
37 School, Newark, New Jersey, USA.

38

39 **Authorship notes:**

40 \*RCL and MB contributed equally to this work. Author order was determined based on order of  
41 joining the project.

42 †RP and WA jointly supervised the project.

43 ‡AMT current address: Department of Cellular, Computational and Integrative Biology,  
44 University of Trento, Trento, Italy.

45

46 **Address correspondence to:** Wadih Arap, Rutgers Cancer Institute of New Jersey, Newark, 205

47 South Orange Avenue, New Jersey 07101, USA. Phone: 973-972-0366; Email:

48 [wadih.arap@rutgers.edu](mailto:wadih.arap@rutgers.edu)

49

50 **Keywords:** Long Noncoding RNA, oncogene, PCA3, prostate cancer, PRUNE2, tumor

51 suppressor gene

52

53 **Abstract**

54 **BACKGROUND:** We have previously shown that the long non-coding (lnc)RNA *prostate*  
55 *cancer associated 3 (PCA3; formerly prostate cancer antigen 3)* functions as a trans-dominant  
56 negative oncogene by targeting the previously unrecognized prostate cancer suppressor gene  
57 *PRUNE2* (a homolog of the *Drosophila prune* gene), thereby forming a functional unit within a  
58 unique allelic locus in human cells. Here we investigated the *PCA3/PRUNE2* regulatory axis  
59 from early (tumorigenic) to late (biochemical recurrence) genetic events during human prostate  
60 cancer progression.

61 **METHODS:** The reciprocal *PCA3* and *PRUNE2* gene expression relationship in paired prostate  
62 cancer and adjacent normal prostate was analyzed in two independent retrospective cohorts of  
63 clinically-annotated cases post-radical prostatectomy: a single-institution discovery cohort  
64 (n=107) and a multi-institution validation cohort (n=497). We compared the tumor gene  
65 expression of *PCA3* and *PRUNE2* to their corresponding expression in the normal prostate. We  
66 also serially examined clinical/pathological variables including time to disease recurrence.

67 **RESULTS:** We consistently observed increased expression of *PCA3* and decreased expression  
68 of *PRUNE2* in prostate cancer compared with the adjacent normal prostate across all tumor  
69 grades and stages. However, there was no association between the relative gene expression levels  
70 of *PCA3* or *PRUNE2* and time to disease recurrence, independent of tumor grades and stages.

71 **CONCLUSIONS:** We concluded that upregulation of the lncRNA *PCA3* and targeted  
72 downregulation of the protein-coding *PRUNE2* gene in prostate cancer could be early (rather  
73 than late) molecular events in the progression of human prostate tumorigenesis but are not  
74 associated with biochemical recurrence. Further studies of *PCA3/PRUNE2* dysregulation are  
75 warranted.

76 **FUNDING:** We received support from the Human Tissue Repository and Tissue Analysis  
77 Shared Resource from the Department of Pathology of the University of New Mexico School of  
78 Medicine and a pilot award from the University of New Mexico Comprehensive Cancer Center.  
79 RP and WA were supported by awards from the Levy-Longenbaugh Donor-Advised Fund and  
80 the Prostate Cancer Foundation. EDN reports research fellowship support from the Brazilian  
81 National Council for Scientific and Technological Development (CNPq), Brazil, and the  
82 Associação Beneficente Alzira Denise Hertzog Silva (ABADHS), Brazil. This work has been  
83 funded in part by the NCI Cancer Center Support Grants (CCSG; P30) to the University of New  
84 Mexico Comprehensive Cancer Center (CA118100) and the Rutgers Cancer Institute of New  
85 Jersey (CA072720).

86

87

88

## 89 Introduction

90 Prostate cancer is the most common cancer and the second most common cause of cancer death  
91 in men<sup>1</sup>, and there continues to be a pressing need for new diagnostic and therapeutic approaches  
92 for this disease, as well as better prognostic biomarkers to guide treatment. Long non-coding  
93 RNA (lncRNA) species are increasingly recognized as having regulatory functions in  
94 tumorigenesis, and nucleic acid-based therapeutics are being developed as a promising means of  
95 targeting pathogenic lncRNAs<sup>2</sup>. Several lncRNAs have recently been found to associate with  
96 prostate cancer, and the best known of these, *prostate cancer associated 3 (PCA3*; formerly  
97 *prostate cancer antigen 3*) has been used clinically for many years as the most specific  
98 diagnostic biomarker for prostate cancer<sup>3,4</sup>; however, its prognostic significance remains  
99 uncertain. Strikingly, *PCA3* emerged first only in mammals, with further evolution in primates<sup>5</sup>,  
100 and, given aspects of the sequence and genomic organization, we have hypothesized that it might  
101 have been introduced into the genome by an ancient oncogenic virus<sup>6</sup>. In humans, *PCA3* has an  
102 unusual genomic organization, being present in an antisense direction within an intron of the  
103 protein-coding gene *PRUNE2*. Somewhat surprisingly for a molecule that is well-established as a  
104 Food & Drug Administration (FDA)- and European Medical Agency (EMA)-approved  
105 biomarker, relatively little was known about the biological function of *PCA3* until recently.  
106 Ferreira et al. showed that *PCA3* is androgen-regulated and that it promotes prostate cancer cell  
107 survival<sup>7</sup>. Subsequently, we have established that *PCA3* downregulates the expression of  
108 *PRUNE2* in a rather unusual way: at the RNA level by RNA editing mediated via adenosine  
109 deaminase RNA specific (ADAR)-family members<sup>8</sup>. We have showed that expressing ectopic  
110 *PCA3* or, alternatively, silencing *PRUNE2* induced cell transformation and cell proliferation *in*  
111 *vitro*, increased adhesion and migration of prostate cancer cells, and yielded larger tumors in

112 xenograft tumor models. The opposite biological effects were seen with *PCA3* silencing or  
113 ectopic *PRUNE2* expression<sup>8</sup>. Preliminary studies of human prostate cancer samples compared to  
114 normal prostate showed increased *PCA3* expression, decreased *PRUNE2* expression, and  
115 evidence for RNA editing of these genes. Based on these experimental findings, we proposed  
116 that there is a functional molecular axis in human prostate cancer in which *PCA3* acts as a  
117 transdominant-negative oncogene to downregulate a previously unrecognized tumor suppressor  
118 gene, *PRUNE2*<sup>8</sup>.

119  
120 Here we propose that this molecular interplay may serve as a translational target for diagnostic  
121 and/or therapeutic intervention in human prostate cancer. First, we present additional correlative  
122 evidence from two retrospective post-surgical primary prostate cancer cohorts in support of our  
123 experimental model of *PCA3* as a dominant-negative oncogene and *PRUNE2* as a tumor  
124 suppressor gene, and for their co-regulation in human prostate cancer. Moreover, we examine the  
125 dysregulation of the *PCA3/PRUNE2* regulatory axis across tumors of different grades (patterns),  
126 stages, and groups<sup>9,10</sup>. Finally, we assess whether tumor expression levels of *PCA3* and/or  
127 *PRUNE2* are prognostic of biochemical disease recurrence after surgery.

128

129

130 **Methods**

131 *Discovery patient cohort.* Based on a power analysis using gene expression data from our prior  
132 work<sup>8</sup>, for the UNMCCC single-institution discovery cohort, we searched the archives of the  
133 Department of Pathology at the UNM School of Medicine for at least 100 consecutive patients  
134 (final cohort size: n=107) who had a radical prostatectomy as the primary treatment for organ-  
135 confined prostate cancer between the years 2001 and 2013 and who had the following clinical  
136 and pathological attributes: final post-prostatectomy Gleason Score 7 [either Gleason Group 2  
137 (3+4) or Gleason Group 3 (4+3)], pathologic stage pT2 or pT3a, negative surgical margins,  
138 negative for seminal vesicle invasion, no evidence of local or distant metastasis, and no prior  
139 treatment for prostate cancer. The following additional data were retrospectively abstracted from  
140 the individual medical records: age at surgery, race, presence of recurrence, type of recurrence  
141 (i.e., biochemical, local, metastatic), and disease-free survival time. Biochemical disease  
142 recurrence was defined as a detectable serum prostate-specific antigen (PSA) concentration of at  
143 least 0.2 ng/mL post-operatively. Lost to follow up was defined as not having been followed up  
144 at the UNMCCC after their urological surgery. All included cases had an independent pathologic  
145 re-review by a Board-certified pathologist with expertise in urological oncology (MB), with  
146 confirmation of diagnosis, Gleason-based analysis (grading, scoring, and grouping), standard  
147 TNM staging, and margin status post-resection. A small number of identified cases (<5%) had to  
148 be excluded due to the very limited amount of tumor present.

149  
150 *Microdissection of tumor and normal prostate (nonneoplastic prostatic glandular tissue) for the*  
151 *discovery cohort.* To obtain tumor for RNA analysis, a representative carcinoma-containing  
152 formalin-fixed paraffin embedded (FFPE) block was chosen from each case. Contiguous foci of



153 tumor were marked on the glass slide such that the density of tumor cells was at least 75%. The  
154 boundary of the corresponding areas on the tumor block was scored with a blade tip, effectively  
155 allowing microdissection of tumor in the process of microtome sectioning. Multiple 10 $\mu$ m  
156 sections were cut, depending on the area of the tumor focus/foci. In 24 (22.4%) of the cases, we  
157 also microdissected areas of nonneoplastic prostatic glandular tissue away from tumor in a  
158 similar manner, again also aiming for at least 75% epithelial density.

159  
160 *Measurement of PRUNE2 and PCA3 gene expression in the discovery cohort by quantitative RT-*  
161 *PCR.* Briefly, gene expression for *PCA3* and *PRUNE2* were determined by quantitative reverse  
162 transcription polymerase chain reaction (qRT-PCR) by using TaqMan gene expression assays  
163 (Thermo Fisher Scientific) with amplicon detection via a LightCycler 96 (Roche Diagnostics).  
164 Gene expression was quantified by the relative logarithmic RT-PCR threshold cycles ( $\Delta$ Ct)  
165 between the target genes and housekeeping control genes<sup>11</sup>. Specifically, total RNA was  
166 extracted from the microdissected FFPE sections using the PureLink™ FFPE Total RNA  
167 Isolation Kit (Thermo Fisher Scientific, Cat. No. K1560-02). RNA was quantified on a  
168 NanoDrop ND-1000 Spectrophotometer (Thermo Fisher Scientific), and the average A260/A280  
169 ratio was 1.94 (range 1.88 to 2.07), indicating optimal quality of the RNA extracted for gene  
170 expression assays. RNA was then further quantified with the Qubit® RNA HS Assay Kit  
171 (Thermo Fisher Scientific, Cat. No. Q32852) on a Qubit 2.0 (Thermo Fisher Scientific) for  
172 accurate RNA concentration. RNA integrity was evaluated with the Agilent RNA 6000 Nano kit  
173 (Agilent Technologies, Cat. No. 5067-1511) on an Agilent 2100 Bio analyzer (Agilent  
174 Technologies). To remove genomic DNA contamination, RNA samples were treated with 2U of

175 DNase I (Thermo Fisher Scientific, Cat. No. 18068-015) per 2µg of total RNA. All procedures  
176 were performed according to the manufacturer's standard protocols.

177  
178 Reverse Transcription was performed in triplicate in order to create enough cDNA for the entire  
179 project. 500ng RNA in each of three tubes was reverse transcribed with the High-Capacity RNA-  
180 to-cDNA™ Kit (Thermo Fisher Scientific, Cat. No. 4387406) in a final volume of 20µl,  
181 according to the manufacturer's instructions. Reverse transcription was carried out in a Gene  
182 Amp PCR System 9700 (Applied Biosystems) at 37°C for 60 minutes and terminated by 95°C for  
183 5 minutes. Then three aliquots were combined for the following experiments.

184  
185 For the Thermo Fisher Scientific TaqMan gene expression assay experiments, three  
186 (Hs00322421\_m1, Hs00999960\_m1, and Hs01060890\_m1) and two (Hs01371939\_g1 and  
187 Hs03462121\_m1) assays were chosen for target genes *PRUNE2* and *PCA3* respectively,  
188 (designated PR1, PR2 and PR3, and PC1 and PC2). Three endogenous controls GAPDH  
189 (Hs02758991\_g1), HPRT1 (Hs02800695\_m1), and UBC (Hs01871556\_s1) were selected  
190 (designated C1, C2 and C3)<sup>12</sup>. Each *PRUNE2* assay and *PCA3* assay was labeled with FAM and  
191 paired with a VIC labeled endogenous control in a duplex reaction, with separate reactions to  
192 include all of the three endogenous controls. Therefore, a total of fifteen duplex gene expression  
193 mixes, nine for *PRUNE2* and six for *PCA3*, was required for all specimens (**Fig. 1 - Source Data**  
194 **File 1** [tumor] and **Fig. 1 - Source Data File 2** [normal]).

195  
196 Each duplex gene expression assay was then performed in triplicate for all specimens following  
197 manufacturer's standard protocols, for a total of 45 expression measures for each case. qRT-PCR

198 was performed with the TaqMan Gene Expression Master Mix (Thermo Fisher Scientific, Cat.  
199 No. 4369514) using 1µl of each TaqMan target gene assay (20×FAM) and endogenous controls  
200 assay (20×VIC), 1µl of cDNA template (equivalent to 25ng RNA input), and 7µl of RNase-free  
201 water for a 20µl final reaction mixture. A non-template control was included in every master mix  
202 in every 96-format tray. In addition, in order to evaluate inter-plate variation, we also included  
203 one RNA sample, in triplicate, in all the 96 format trays. Analysis of these controls indicated that  
204 there were no significant batch effects (data not shown). The qRT-PCR product detection was  
205 achieved on a LightCycler 96 (Roche Diagnostics). The cycle program was: at 95°C for 10  
206 minutes, followed by 40 cycles at 95°C for 15 seconds and at 60°C for 1 minute. Quantification  
207 of target and control genes (Cq) in each sample was performed by LightCycler® 96 SW 1.1  
208 (Roche Diagnostics).

209  
210 *Validation patient cohort.* For the TGCA patient validation cohort (n=497 patients), we first  
211 downloaded clinical data along with the expression of the lncRNA *PCA3* and the *PRUNE2* gene  
212 (<http://cancergenome.nih.gov>) with the UCSC Xena browser<sup>13,14</sup>, together with paired  
213 nonneoplastic samples in 52 of the cases (10.5%). The following clinical and pathological  
214 characteristics were included in the study: age at diagnosis, vital status, tumor Gleason-based  
215 analysis (grading, scoring, grouping), pathological stage, status of biochemical recurrence, and  
216 time to recurrence. Gene expression was calculated with RSEM<sup>15,16</sup>. By using the available  
217 dataset, we evaluated *PCA3* and *PRUNE2* gene expression values in terms of tumor versus  
218 nonneoplastic prostate, biochemical recurrence, pathologic T stage, Gleason analysis (Grade,  
219 Score, and Group), age at pathology-proven diagnosis. Because the regulation of *PRUNE2* by  
220 *PCA3* occurs at the RNA level by the formation of an RNA hetero-duplex, we also evaluated the

221 ratio of the expression of the two genes in terms of the clinical and pathological variables for  
222 each patient of the cohort.

223  
224 *Statistics.* Demographic and clinical variables were summarized with descriptive statistics. For  
225 the discovery cohort, the mean and median of gene expressions across multiple control genes and  
226 assays were summarized, and these were used as measures for gene expression of *PRUNE2* and  
227 *PCA3* relative to endogenous housekeeping controls for each case. More detailed methods are  
228 described in the supplemental materials.

229  
230 Testing for differences of *PCA3* and *PRUNE2* expression between paired tumor and  
231 nonneoplastic prostate expression was by the Wilcoxon signed rank test. The Kruskal-Wallis test  
232 was used when comparing three or more groups. Assessment for significant differences of gene  
233 expression by recurrence status was by Wilcoxon rank sum test. The Kaplan-Meier product limit  
234 method with log-rank test was used to explore the relationship between gene expression levels or  
235 the ratio and the time to recurrence. Multivariable Cox proportional hazard modeling was used to  
236 fit for the association between time to recurrence and expression levels of *PRUNE2* or *PCA3* or  
237 their ratio, while controlling for multiple clinical covariates. All statistical analyses were carried  
238 out by using the SAS (9.4) or R software package (R 3.4.5), unless otherwise indicated (R and  
239 SAS codes are available in the **Source Code File**).

240  
241 *Study approval.* For the discovery cohort, there was University of New Mexico Health Sciences  
242 Institutional Review Board (IRB) approval (HRRC15-138), and the study was carried out in  
243 accordance with the United States Common Rule.

244 **Results**

245 *Discovery Single-Institutional Cohort*

246 In the initial single-institution discovery cohort from the University of New Mexico  
247 Comprehensive Cancer Center (UNMCCC), patients with intermediate-risk (Gleason Score 7;  
248 corresponding to Gleason Groups 2 and 3) organ-confined prostate cancer (n=107) met the  
249 criteria for inclusion in this study (**Table 1**). Briefly, the mean age of the cohort was 63 years old  
250 (ranging from 45 to 84 years old); most patients (85%) were non-Hispanic white, but Hispanic  
251 (7.5%), American Indian/Native American (2.8%), and African American (2.8%) men were also  
252 represented. All patients had final Gleason Score 7 adenocarcinoma after radical prostatectomy,  
253 with 86.9% being 3+4=7 (Gleason Group 2) and 13.1% being 4+3=7 (Gleason Group 3). The  
254 pathologic stage distribution was as follows: 74.8% were pT2 and 25.2% were pT3a. Nineteen of  
255 the patients (17.8%) had biochemical recurrence discovered during follow up, including one with  
256 documented local recurrence and one with documented metastases. Five patients (4.7%) were  
257 lost to follow up.

258  
259 RNA extraction and quantitative real-time polymerase chain reaction (qRT-PCR) were  
260 successful in all microdissected tumor samples (n=107). In 24 of these cases (22.4%), we  
261 extracted RNA from benign prostatic glandular tissue away from tumor (hereafter termed  
262 “normal prostate”: qRT-PCR was successful in all cases for *PRUNE2* (n=24, 100%) and in most  
263 cases for *PCA3* (n=21, 87.5%). Comparing *PRUNE2* and *PCA3* expression in prostatic  
264 adenocarcinoma with expression in normal prostate (all relative to endogenous housekeeping  
265 controls), we found consistent trends for both genes in multiple assays, with lower expression of  
266 *PRUNE2* in tumor as compared with normal prostate and higher expression of *PCA3* in tumor as

267 compared with normal prostate (**Fig. 1 - Source Data File 3**). These results are summarized in  
268 **Figure 1A** and as follows. Relative to controls, *PCA3* expression was significantly higher in  
269 prostatic adenocarcinoma (mean: 2.46; standard deviation: 1.28) than normal prostate (-1.99;  
270 2.63, [p-value<0.001]). Relative to controls, *PRUNE2* expression was significantly lower in  
271 tumor (mean: -1.48; standard deviation: 0.92) than normal prostate (-0.78; 0.4, [p-value<0.001]).  
272  
273 We next explored the association between biochemical recurrence and tumor expression levels of  
274 *PRUNE2*, *PCA3* and the ratio of *PRUNE2* to *PCA3* expression by using several approaches.  
275 First, we compared the gene expression values and their ratio by recurrence status. In patients  
276 who recurred compared to those who did not, we found no significant difference in mean  
277 expression values of *PRUNE2* (-1.6 vs. -1.58; p-value=0.68), *PCA3* (2.98 vs. 2.43; p-  
278 value=0.16), or their ratio (-1.61 vs. -1.21, p-value=0.48). The different expression levels by  
279 recurrence were not significant (**Figure 1B, Supplemental Figure S1**). Next, for *PRUNE2*  
280 expression, *PCA3* expression, and their ratio, we regrouped the cancer cases according to  
281 whether the values were greater than (deemed “high”) or less than/equal to (deemed “low”) their  
282 respective mean values. By using the Kaplan-Meier product limit methodology and the log-rank  
283 test, we found no significant associations between high or low levels and time to recurrence for  
284 *PRUNE2* expression (p-value=0.24), *PCA3* expression (p-value=0.22), (**Figure 2 and Tables 2-**  
285 **3**), or their ratio (p-value=0.84). As a further assessment of association between gene expression  
286 and time to biochemical recurrence, we used Cox proportional hazards modeling and found no  
287 significant associations of time to biochemical recurrence with expression of *PRUNE2* (hazard  
288 ratio [HR]: 0.97; 95% confidence interval [CI]: 0.58–1.63, [p-value=0.91]) or *PCA3* (HR: 1.21;  
289 95% CI: 0.91–1.6, [p-value=0.19]), or their ratio (HR: 0.99; 95% CI: 0.92–1.1, [p-value=0.82]).

290 By multivariable Cox modeling, we did not find that expression of *PRUNE2*, *PCA3* or their ratio  
291 added any additional predictive information for recurrence to that provided by clinical or  
292 pathological variables, as presented in supplemental results and **Supplemental Table S1**.

293

#### 294 *Validation/Confirmation Multi-Institutional Cohort*

295 For the analysis of a second multi-institutional validation/confirmation and expansion prostate  
296 cancer cohort from The Cancer Genome Atlas (TCGA), patient clinical data (**Table 4**) and gene  
297 expression data were available on men with prostate cancer (n=497). Gene expression data from  
298 nonneoplastic prostatic tissue (hereafter termed “normal prostate”) were also available in 52  
299 (10.5%) of the cases. The basis for the cohort has been described previously<sup>13</sup>. Briefly, the cohort  
300 comprised men whose ages ranged from 41 to 78 years old, and who had a radical prostatectomy  
301 for primary prostate cancer. The distribution of prostate cancer grades was as follows: Gleason  
302 Score 3+3=6 (Group 1), 9.0%; Gleason Scores 3+4=7 or 4+3=7 (Groups 2 and 3), 49.7%;  
303 Gleason Score 4+4=8 (Group 4), 12.9%; and Gleason Scores 4+5=9 or 5+4=9, 27.6%; and  
304 5+5=10 (Group 5), 0.8%. For pathologic stage, most tumors were pT2c (33%), pT3a (32%), or  
305 pT3b (27%), with a small fraction being pT4 (2%). Data on disease recurrence were available for  
306 429 men (86.3%), with 58 (11.7% [13.5% of those with follow-up information available]) having  
307 biochemical recurrence.

308

309 We compared gene expression levels ( $\log_2$  RNA-Seq by Expectation-Maximization  
310 [RSEM]) in prostatic adenocarcinoma to those in normal prostate samples in the data set from  
311 TCGA (**Figure 3A**): *PCA3* had significantly increased expression in carcinoma [median: 12.4;  
312 interquartile range (IQR): 10.3-13.7] as compared with normal prostate [median: 6.9; IQR: 5.2-

313 9.6, [p-value<0.001]), and *PRUNE2* showed simultaneous lower expression in carcinoma  
314 (median: 11.4; IQR: 10.7-12.0) versus normal prostate (median: 12.2; IQR: 11.8-12.6, [p-  
315 value<0.001]). As depicted in **Figure 3B**, comparing tumor gene expression across different  
316 prostate cancer pathologic grades, *PCA3* expression was significantly lower in tumors with  
317 Gleason Score greater than 7 (median: 11.6; IQR: 8.4-13.4) than in tumors with Gleason Score 7  
318 (median: 12.8; IQR: 11.3-13.8, [p-value<.001]) or less than 7 (median: 12.5; IQR: 11.8-13.7, [p-  
319 value=0.01]). *PRUNE2* showed a small decrease in expression in tumors with Gleason Score  
320 greater than 7 (median: 11.3; IQR: 10.4-11.9) as compared with tumors with Gleason Score 7  
321 (median: 11.5; IQR: 10.8-12.1, [p-value=0.014]) or less than 7 (median: 11.6; IQR: 11.0-12.1,  
322 [p-value=.049]). As shown in **Figure 3C**, comparing tumor gene expression across different  
323 tumor pathologic stages, *PCA3* expression was higher in pT2 tumors (median: 12.6; IQR: 11.2-  
324 13.8) than in tumors that were pT3 (median: 12.2; IQR: 9.7-13.6, [p-value=0.01]) or pT4  
325 (median: 12.1; IQR: 9.6-12.7, [p-value=0.61]). There was no significant difference (p-  
326 value>0.05) between *PRUNE2* expression levels between the different tumor stages: pT2  
327 (median: 11.4; IQR: 10.7-12.1), pT3 (median: 11.3; IQR: 10.6-12.0), and pT4 (median: 11.7;  
328 IQR: 10.8-12.1). We also found that the ratio of *PCA3/PRUNE2* expression showed similar  
329 associations with Gleason Score and pathologic stage as were seen with *PCA3* expression (data  
330 not shown). Overall, despite the differences in gene expression among tumor grades and stages,  
331 the median expression of *PCA3* was significantly higher in all tumor grades and stages than the  
332 expression of *PCA3* in normal prostate, and, inversely, the median expression of *PRUNE2* in all  
333 tumor grades and stages was significantly less than the expression of *PRUNE2* in normal  
334 prostate.

335



336 As shown for the discovery cohort, we also evaluated the relationship between *PCA3* and  
337 *PRUNE2* expression levels and recurrence status. We found that patients who had biochemical  
338 recurrence after prostatectomy had significantly lower tumor expression levels of *PCA3* (median,  
339 11.58; IQR, 8.28-13.14) than those who did not recur [12.51; 10.64-13.71, (p-value<0.01);  
340 **Figure 3D**]. However, we did not see an association between tumor *PCA3* expression and  
341 biochemical recurrence on multivariable Cox proportional hazards modeling when adjusting for  
342 tumor grade, stage, and age at diagnosis [HR, 0.96; 95% CI, 0.87-1.04, (p-value=0.36)], as  
343 presented in supplemental results and **Supplemental Table S2**. We did not see a significant  
344 association between *PRUNE2* expression in those patients that had biochemical recurrence as  
345 compared with those patients who did not recur (**Supplemental Figure S2**).

346

347

## 348 Discussion

349 Here we assessed the tumor and control adjacent normal prostatic glandular tissue expression of  
350 the lncRNA *PCA3* and the protein-coding *PRUNE2* gene in two independent retrospective  
351 cohorts of patients with primary organ-confined prostate cancer after treatment by radical  
352 prostatectomies (**Figure 4**). As compared with normal prostate, we found that prostate cancer  
353 showed consistent increased expression of *PCA3* and consistent decreased expression of  
354 *PRUNE2* in tumors across a broad range of pathological attributes (i.e., Gleason grades, scores,  
355 groups and stages) in both patient cohorts. These findings support the mechanistic role of a  
356 tumor-specific molecular axis in which *PCA3* acts as dominant-negative oncogene and *PRUNE2*  
357 as a tumor suppressor gene in human prostate cancer and indicate that the interplay between  
358 these genes is dysregulated early in prostate cancer.

359  
360 Specifically, when we compared *PCA3* expression in the validation cohort from TCGA, although  
361 average expression in all grades, stages, and groups was higher than in normal prostate, we found  
362 that among tumors there was significantly decreased *PCA3* expression in tumors with higher  
363 grades (Gleason score >7) and in higher stages (>pT2), as compared with lower grades, stages,  
364 or groups, respectively. These paradoxical findings are consistent with several early studies<sup>17,18</sup>  
365 and in particular with a recent tissue-based study of *PCA3* expression in prostate cancer<sup>19</sup>. In that  
366 large cohort study, lower levels of tumor *PCA3* in both biopsy and radical prostatectomy  
367 specimens were associated with high-grade tumors, and in radical prostatectomy specimens  
368 decreased *PCA3* expression was associated with features of higher stages. Based on these results,  
369 it has been proposed that *PCA3* might actually represent a differentiation marker in human  
370 prostate cancer<sup>19</sup>. The finding of decreasing *PCA3* expression with increasing tumor grades and

371 stages in both our study and others is broadly consistent with another previous study<sup>20</sup>, which  
372 found that the class of antisense intronic RNAs was markedly over-represented among the top  
373 transcripts associated with tumor differentiation in human prostate cancer. The finding of an  
374 inverse association between *PCA3* expression and increasing grades and stages may also relate to  
375 links between *PCA3* expression and androgen receptor (AR) signaling and the likelihood of  
376 *PCA3* having an important role in the early steps of prostate cancer carcinogenesis, with a  
377 reduced role when the disease is more advanced. Indeed, previous work by our own group and  
378 by others indicates that *PCA3* is upregulated by AR signaling<sup>6-8</sup>, and that *PCA3* is also involved  
379 in modulating AR signaling<sup>7,21</sup>. Interestingly, it also has been shown *in vitro* that *PCA3* silencing  
380 sensitizes prostate cancer cells to enzalutamide-induced decreased cell growth<sup>22</sup>. Alshalalfa et al.  
381 suggest that because low pretreatment serum testosterone levels are associated with diseases with  
382 higher grades and stages, and because of the relationship between AR signaling and *PCA3*  
383 expression, therefore lower *PCA3* expression may reflect the lower serum testosterone in these  
384 patients<sup>19</sup>. Although, we do not have any data on the pretreatment serum concentration of  
385 testosterone and other androgens, our tumor *PCA3* expression findings could perhaps be  
386 consistent with that interpretation.

387  
388 Because prostate cancers, especially Gleason Score 7 (Groups 2 and 3) tumors, are quite frequent  
389 (about half of the total cases) and show divergent clinical behavior, there is great interest in  
390 developing prognostic biomarkers for risk stratification. Studies on the association of *PCA3*  
391 expression levels with outcome and prognosis show conflicting results<sup>23</sup>, and unlike this present  
392 study, most prior reports are based on urinary *PCA3* expression<sup>24-26</sup>. Our exploration of the  
393 validation cohort from TCGA, which comprised a wide spectrum of tumor grades and stages,

394 revealed an association between lower levels of tumor *PCA3* expression and biochemical  
395 recurrence; however, this association was not found after taking grade and stage into account.  
396 This finding makes sense, as increasing grade and stage are both variables that are associated  
397 with lower *PCA3* expression. In their tissue-based cohort, Alshalalfa et al.<sup>19</sup> also found an  
398 association between low *PCA3* levels and adverse outcomes, including biochemical recurrence,  
399 metastasis and prostate cancer-specific mortality; however, it is not clear whether such findings  
400 are independent of clinical and pathological variables (such as Gleason grade, stage, and group),  
401 as a multivariable analysis was not reported. For the discovery cohort of patients, we selected  
402 organ-confined, intermediate-risk tumors (Gleason groups 2 and 3, with tumor stages pT2 and  
403 pT3) where prognostic information might be expected to be most helpful clinically, to test for an  
404 association with outcome. We did not see any association between tumor *PCA3* expression and  
405 biochemical recurrence.

406  
407 *PRUNE2*, a human homolog of the *Drosophila prune* gene, encodes for a protein with BCH,  
408 DHHA2, and PPX1 functional domains<sup>7</sup>. The BCH domain can inhibit the Rho family of  
409 proteins, small GTPases with roles in cell transformation, migration and metastasis, and cell  
410 cycle progression<sup>5,27</sup>. Evidence is accumulating that *PRUNE2* might act as a tumor suppressor  
411 gene. Loss-of-function mutations have been described in several tumor types, including germline  
412 and somatic mutations in parathyroid cancer<sup>28</sup> and somatic mutations in solid papillary  
413 carcinoma<sup>29</sup>, while high expression of *PRUNE2* protein correlates with favorable prognosis in  
414 neuroblastoma<sup>30</sup>. Others have shown evidence of inactivating *PRUNE2* mutations in Merkel cell  
415 carcinoma<sup>31</sup> and that the restoration of downregulated *PRUNE2* in oral cancer suppresses tumor  
416 cell migration<sup>32</sup>, further supporting the role of *PRUNE2* as a tumor suppressor. In prostate

417 cancer, the evidence is limited and controversial: an early report found that *PRUNE2* expression  
418 was upregulated in prostate cancer and metastases in a small number of samples, and was  
419 androgen-inducible in prostate cancer cells<sup>5</sup>. However, a subsequent study on a larger number of  
420 samples found that *PRUNE2* expression either decreased or did not increase in aggressive  
421 prostate cancer, and that *PRUNE2* expression was not androgen-inducible<sup>17</sup>.

422  
423 Altogether, the findings in the current study provide additional support for our previous findings<sup>8</sup>  
424 that *PRUNE2* acts as a functional tumor suppressor gene in human prostate cancer. Here we  
425 described consistently lower expression of *PRUNE2* in prostate cancers of all grades and stages  
426 as compared to normal prostate. The findings in our present study are also consistent with the  
427 negative regulation of *PRUNE2* by *PCA3* in prostate cancer. We found no significant differences  
428 in *PRUNE2* expression across tumor stage, and only a small decrease in expression with  
429 increasing tumor grade, suggesting that loss of *PRUNE2* tumor suppressor activity is an early  
430 molecular event in prostate cancer. We are not aware of any prior reports of the prognostic  
431 significance of tumor *PRUNE2* expression in prostate cancer but, at least in this retrospective  
432 study of two independent prostate cancer patient cohorts, we did not find any association  
433 between *PRUNE2* expression and biochemical outcomes.

434  
435 Strengths of this study include that broadly consistent findings were described in the two  
436 independent well-characterized clinically annotated primary prostate cancer cohorts used for  
437 analysis, and that the findings were robust across multiple assays in the discovery patient cohort  
438 and between the different methods of measurement of gene expression used in the two cohorts.  
439 The assessment of *PCA3* expression directly and specifically in tissue (as opposed to urine) is a

440 novelty and a strength as our primary goal was the study of the *PRUNE2/PCA3* regulatory axis  
441 in human prostate cancer. We reasoned that the study of tissue expression is likely more  
442 informative of tumor biology than traditional urinalysis, not least of all because urinary  
443 expression, though very well characterized, could be subject to potential confounding issues such  
444 as RNA stability in urine or the contribution of differential urinary shedding. However, from the  
445 standpoint of assessment of prognostic information, a drawback of analyzing tissue *PCA3*  
446 expression is that the results are not directly comparable to the multiple previous studies that  
447 measured urinary *PCA3* scores and ultimately led to FDA and EMA approval for clinical  
448 applications in the US and EU. Moreover, while we did find consistent findings with a large  
449 tissue cohort study relating *PCA3* expression and biochemical recurrence<sup>19</sup>, the analysis  
450 presented here was limited in its ability to unequivocally determine the prognostic value of *PCA3*  
451 and *PRUNE2* expression as the overall proportion of patients with biochemical recurrences was  
452 relatively low. Finally, we were not able to fully address the relationship of reciprocal gene  
453 expression of *PCA3* and *PRUNE2* to the outcomes of metastases and prostate cancer-specific  
454 deaths, again due to the relative paucity of these events.

455  
456 In conclusion, we found consistent upregulation of *PCA3* and downregulation of *PRUNE2* in  
457 prostate cancer as compared with normal prostate in two retrospective and independent patient  
458 cohorts (summarized in **Figure 4**), supporting that *PCA3* and *PRUNE3* function as an oncogene  
459 and a tumor suppressor gene, respectively, in human prostate cancer. The inverse correlation of  
460 *PCA3* and *PRUNE2* expression is consistent with our prior findings of a functional interplay  
461 between the two genes as part of a unique regulatory unit functioning at a single genetic locus in  
462 prostate cancer cells with *PCA3* negatively down-regulating *PRUNE2* expression<sup>8</sup>. The

463 mechanistic dysregulation of *PCA3* and *PRUNE2* is observed across the spectrum of tumor  
464 grades and stages, suggesting that this is an early and stable molecular event in prostate cancer.  
465 On the other hand, we have not detected any regulatory effects of *PRUNE2/PCA3* in late genetic  
466 events such as prostate cancer progressing to biochemical recurrence, which includes the  
467 development of local tumor recurrence and/or the development of metastatic disease. The  
468 findings presented here represent additional evidence for the functional reciprocal co-regulation  
469 of *PCA3* and *PRUNE2* in the setting of early tumorigenesis but not in late events in human  
470 prostate cancer. Taken together along with the well-documented specificity of *PCA3*  
471 overexpression, our findings establish the *PCA3/PRUNE2* regulatory axis as an attractive early  
472 molecular target candidate for intervention in the therapy of human prostate cancer.  
473  
474

475

476 **Author contributions**

477 RCL, MB, EDN, DJM, RP, WA conceptualized the project; RCL, MB, TLS, AMT, JW, RD,  
478 JHL, AR, ASD, MAA, DNN, ITS, EDN, DJM collected and curated the data; RCL, MB, TLS,  
479 AMT, JW, RD, JHL, AR, ASD, MAA, DNN, ITS, EDN, DJM performed experiments and  
480 provided reagents or critical insights; RCL, MB, TLS, AMT, JW, RD, JHL, AR, ASD, MAA,  
481 DNN, ITS, EDN, IC, DJM, WKC,RP, WA analyzed the data; RCL, MB, EDN, DJM, RP, WA  
482 wrote the first manuscript draft to which all authors contributed edits; RCL, EDN, DJM, RP, WA  
483 obtained funding for the study. RCL, MB, RP, WA, supervised the study.

484

485 **Acknowledgements**

486 We received support from the Human Tissue Repository and Tissue Analysis Shared Resource  
487 from the Department of Pathology of the University of New Mexico School of Medicine and a  
488 pilot award from the University of New Mexico Comprehensive Cancer Center. RP and WA  
489 were supported by awards from the Levy-Longenbaugh Donor-Advised Fund and the Prostate  
490 Cancer Foundation. EDN reports research fellowship support from the Brazilian National  
491 Council for Scientific and Technological Development (CNPq), Brazil, and the Associação  
492 Beneficente Alzira Denise Hertzog Silva (ABADHS), Brazil. This work has been funded in part  
493 by the NCI Cancer Center Support Grants (CCSG; P30) to the University of New Mexico  
494 Comprehensive Cancer Center (CA118100) and the Rutgers Cancer Institute of New Jersey  
495 (CA072720). The results shown here are in part based upon data generated by the TCGA  
496 Research Network: <https://www.cancer.gov/tcga>. These data have been presented in part at the  
497 2017 American Society of Clinical Oncology Annual Meeting:



498

499 Richard C. Lauer, Marc Barry, Jin Wu, Ji-Hyun Lee, Dennis J. McCance, Ruofei Du, Arpit  
500 Rao, Andrey S. Dobroff, Emmanuel Dias-Neto, Isan Chen, Renata Pasqualini, and Wadih Arap.  
501 Evaluation of *PRUNE2* and *PCA3* expression as metastasis predictors in Gleason 7 prostate  
502 cancer. *J Clin Oncol* 2017; 35:15\_suppl, e16583.

503

504 Richard C. Lauer, Marc Barry, Jin Wu, Ji-Hyun Lee, Dennis J. McCance, Ruofei Du, Arpit  
505 Rao, Andrey S. Dobroff, Emmanuel Dias-Neto, Isan Chen, Renata Pasqualini, and Wadih Arap.  
506 *PRUNE2* and *PCA3* expression in paired non-malignant and tumor specimens from radical  
507 prostatectomy patients with Gleason score 7 prostate cancer. *J Clin Oncol* 2017;  
508 35:15\_suppl, e16582.

509

510 Emmanuel Dias-Neto, Diana N. Nunes, Andrew M. Thomas, Tracey L. Smith, Arpit Rao,  
511 Richard C. Lauer, Isan Chen, Wadih Arap, Renata Pasqualini. *PCA3* upregulation in prostate  
512 cancer: Analysis in a cohort of 497 subjects from TCGA. *J Clin Oncol* 2017 35:15\_suppl,  
513 e16578.

514

515 **Competing interest:** The University of New Mexico filed patent applications on *PRUNE2*-  
516 related technology (inventors: DNN, EDN, RP, and WA). Those applications were briefly  
517 optioned by MBrace Therapeutics, but the applications have since been abandoned and the  
518 agreements terminated. WA and RP are founders and equity stockholders of PhageNova Bio,  
519 Inc. and of MBrace Therapeutics, Inc.; RP also serves as the Chief Scientific Officer and a paid  
520 consultant of PhageNova Bio and as a member of the Board of Directors and a paid consultant

521 for MBrace Therapeutics. IC serves as the Chief Executive Officer of MBrace Therapeutics.  
522 Mbrace did not provide financial support for the present work. WKC is a founder and  
523 shareholder of Interleukin Combinatorial Therapies, Inc., InVaMet, Inc., and io9, LLC; none of  
524 these companies provided funds or participated in the present work. These arrangements are  
525 managed in accordance with the established institutional conflict of interest policies for the  
526 respective institutions. The remaining authors have declared no potential competing interests  
527 exist.

528

529

530 **References:**

- 531 1. Siegel RL, Miller KD, Fuchs HE, Jemal A. Cancer Statistics, 2021. *CA Cancer J Clin.*  
532 Jan 2021;71(1):7-33. doi:10.3322/caac.21654
- 533 2. Arun G, Diermeier SD, Spector DL. Therapeutic Targeting of Long Non-Coding RNAs  
534 in Cancer. *Trends Mol Med.* Mar 2018;24(3):257-277. doi:10.1016/j.molmed.2018.01.001
- 535 3. Bussemakers MJ, van Bokhoven A, Verhaegh GW, et al. DD3: a new prostate-specific  
536 gene, highly overexpressed in prostate cancer. *Cancer Res.* Dec 1 1999;59(23):5975-9.
- 537 4. de Kok JB, Verhaegh GW, Roelofs RW, et al. DD3(PCA3), a very sensitive and specific  
538 marker to detect prostate tumors. *Cancer Res.* May 1 2002;62(9):2695-8.
- 539 5. Clarke RA, Zhao Z, Guo AY, et al. New genomic structure for prostate cancer specific  
540 gene PCA3 within BMCC1: implications for prostate cancer detection and progression. *PLoS*  
541 *One.* 2009;4(3):e4995. doi:10.1371/journal.pone.0004995
- 542 6. Teixeira AA, Marchio S, Dias-Neto E, et al. Going viral? Linking the etiology of human  
543 prostate cancer to the PCA3 long noncoding RNA and oncogenic viruses. *EMBO Mol Med.* Oct  
544 2017;9(10):1327-1330. doi:10.15252/emmm.201708072
- 545 7. Ferreira LB, Palumbo A, de Mello KD, et al. PCA3 noncoding RNA is involved in the  
546 control of prostate-cancer cell survival and modulates androgen receptor signaling. *BMC Cancer.*  
547 Nov 6 2012;12:507. doi:10.1186/1471-2407-12-507
- 548 8. Salameh A, Lee AK, Cardo-Vila M, et al. PRUNE2 is a human prostate cancer  
549 suppressor regulated by the intronic long noncoding RNA PCA3. *Proc Natl Acad Sci U S A.* Jul  
550 7 2015;112(27):8403-8. doi:10.1073/pnas.1507882112
- 551 9. Gordetsky J, Epstein J. Grading of prostatic adenocarcinoma: current state and prognostic  
552 implications. *Diagn Pathol.* Mar 9 2016;11:25. doi:10.1186/s13000-016-0478-2

- 553 10. van Leenders G, van der Kwast TH, Grignon DJ, et al. The 2019 International Society of  
554 Urological Pathology (ISUP) Consensus Conference on Grading of Prostatic Carcinoma. *Am J*  
555 *Surg Pathol*. Aug 2020;44(8):e87-e99. doi:10.1097/PAS.0000000000001497
- 556 11. Livak KJ, Schmittgen TD. Analysis of relative gene expression data using real-time  
557 quantitative PCR and the 2<sup>(-Delta Delta C(T))</sup> Method. *Methods*. Dec 2001;25(4):402-8.  
558 doi:10.1006/meth.2001.1262
- 559 12. Vandesompele J, De Preter K, Pattyn F, et al. Accurate normalization of real-time  
560 quantitative RT-PCR data by geometric averaging of multiple internal control genes. *Genome*  
561 *Biol*. Jun 18 2002;3(7):RESEARCH0034. doi:10.1186/gb-2002-3-7-research0034
- 562 13. Cancer Genome Atlas Research N. The Molecular Taxonomy of Primary Prostate  
563 Cancer. *Cell*. Nov 5 2015;163(4):1011-25. doi:10.1016/j.cell.2015.10.025
- 564 14. University of North Carolina TCGA Genome Characterization Center. TCGA prostate  
565 adenocarcinoma (PRAD) gene expression by RNAseq (polyA+ IlluminaHiSeq). 2017.  
566 [https://xenabrowser.net/datapages/?dataset=TCGA.PRAD.sampleMap%2FHiSeqV2&host=https](https://xenabrowser.net/datapages/?dataset=TCGA.PRAD.sampleMap%2FHiSeqV2&host=https%3A%2F%2Ftcga.xenahubs.net&removeHub=https%3A%2F%2Fxena.treehouse.gi.ucsc.edu%3A443)  
567 [%3A%2F%2Ftcga.xenahubs.net&removeHub=https%3A%2F%2Fxena.treehouse.gi.ucsc.edu%3](https://xenabrowser.net/datapages/?dataset=TCGA.PRAD.sampleMap%2FHiSeqV2&host=https%3A%2F%2Ftcga.xenahubs.net&removeHub=https%3A%2F%2Fxena.treehouse.gi.ucsc.edu%3A443)  
568 A443
- 569 15. Li B, Dewey CN. RSEM: accurate transcript quantification from RNA-Seq data with or  
570 without a reference genome. *BMC Bioinformatics*. Aug 4 2011;12:323. doi:10.1186/1471-2105-  
571 12-323
- 572 16. Goldman MJ, Craft B, Hastie M, et al. Visualizing and interpreting cancer genomics data  
573 via the Xena platform. *Nat Biotechnol*. 06 2020;38(6):675-678. doi:10.1038/s41587-020-0546-8

- 574 17. Salagierski M, Verhaegh GW, Jannink SA, Smit FP, Hessels D, Schalken JA. Differential  
575 expression of PCA3 and its overlapping PRUNE2 transcript in prostate cancer. *Prostate*. Jan 1  
576 2010;70(1):70-8. doi:10.1002/pros.21040
- 577 18. Balcerczak E, Mirowski M, Sasor A, Wierzbicki R. Expression of p65, DD3 and c-erbB2  
578 genes in prostate cancer. *Neoplasma*. 2003;50(2):97-101.
- 579 19. Alshalalfa M, Verhaegh GW, Gibb EA, et al. Low PCA3 expression is a marker of poor  
580 differentiation in localized prostate tumors: exploratory analysis from 12,076 patients.  
581 *Oncotarget*. Aug 1 2017;8(31):50804-50813. doi:10.18632/oncotarget.15133
- 582 20. Reis EM, Nakaya HI, Louro R, et al. Antisense intronic non-coding RNA levels correlate  
583 to the degree of tumor differentiation in prostate cancer. *Oncogene*. Aug 26 2004;23(39):6684-  
584 92. doi:10.1038/sj.onc.1207880
- 585 21. Lemos AE, Ferreira LB, Batoreu NM, de Freitas PP, Bonamino MH, Gimba ER. PCA3  
586 long noncoding RNA modulates the expression of key cancer-related genes in LNCaP prostate  
587 cancer cells. *Tumour Biol*. Aug 2016;37(8):11339-48. doi:10.1007/s13277-016-5012-3
- 588 22. Ozgur E, Celik AI, Darendeliler E, Gezer U. PCA3 Silencing Sensitizes Prostate Cancer  
589 Cells to Enzalutamide-mediated Androgen Receptor Blockade. *Anticancer Res*. Jul  
590 2017;37(7):3631-3637. doi:10.21873/anticancer.11733
- 591 23. Loeb S, Partin AW. Review of the literature: PCA3 for prostate cancer risk assessment  
592 and prognostication. *Rev Urol*. 2011;13(4):e191-5.
- 593 24. Loeb S, Bruinsma SM, Nicholson J, et al. Active surveillance for prostate cancer: a  
594 systematic review of clinicopathologic variables and biomarkers for risk stratification. *Eur Urol*.  
595 Apr 2015;67(4):619-26. doi:10.1016/j.eururo.2014.10.010

- 596 25. Lemos AEG, Matos ADR, Ferreira LB, Gimba ERP. The long non-coding RNA PCA3:  
597 an update of its functions and clinical applications as a biomarker in prostate cancer. *Oncotarget*.  
598 Nov 12 2019;10(61):6589-6603. doi:10.18632/oncotarget.27284
- 599 26. Fenstermaker M, Mendhiratta N, Bjurlin MA, et al. Risk Stratification by Urinary  
600 Prostate Cancer Gene 3 Testing Before Magnetic Resonance Imaging-Ultrasound Fusion-  
601 targeted Prostate Biopsy Among Men With No History of Biopsy. *Urology*. Jan 2017;99:174-  
602 179. doi:10.1016/j.urology.2016.08.022
- 603 27. Iwama E, Tsuchimoto D, Iyama T, et al. Cancer-related PRUNE2 protein is associated  
604 with nucleotides and is highly expressed in mature nerve tissues. *J Mol Neurosci*. Jun  
605 2011;44(2):103-14. doi:10.1007/s12031-010-9490-2
- 606 28. Yu W, McPherson JR, Stevenson M, et al. Whole-exome sequencing studies of  
607 parathyroid carcinomas reveal novel PRUNE2 mutations, distinctive mutational spectra related  
608 to APOBEC-catalyzed DNA mutagenesis and mutational enrichment in kinases associated with  
609 cell migration and invasion. *J Clin Endocrinol Metab*. Feb 2015;100(2):E360-4.  
610 doi:10.1210/jc.2014-3238
- 611 29. Alsadoun N, MacGrogan G, Truntzer C, et al. Solid papillary carcinoma with reverse  
612 polarity of the breast harbors specific morphologic, immunohistochemical and molecular profile  
613 in comparison with other benign or malignant papillary lesions of the breast: a comparative study  
614 of 9 additional cases. *Mod Pathol*. Sep 2018;31(9):1367-1380. doi:10.1038/s41379-018-0047-1
- 615 30. Machida T, Fujita T, Ooo ML, et al. Increased expression of proapoptotic BMCC1, a  
616 novel gene with the BNIP2 and Cdc42GAP homology (BCH) domain, is associated with  
617 favorable prognosis in human neuroblastomas. *Oncogene*. Mar 23 2006;25(13):1931-42.  
618 doi:10.1038/sj.onc.1209225

- 619 31. Harms PW, Vats P, Verhaegen ME, et al. The Distinctive Mutational Spectra of  
620 Polyomavirus-Negative Merkel Cell Carcinoma. *Cancer Res.* Sep 15 2015;75(18):3720-3727.  
621 doi:10.1158/0008-5472.CAN-15-0702
- 622 32. Su SC, Yeh CM, Lin CW, et al. A novel melatonin-regulated lncRNA suppresses TPA-  
623 induced oral cancer cell motility through replenishing PRUNE2 expression. *J Pineal Res.* Oct  
624 2021;71(3):e12760. doi:10.1111/jpi.12760
- 625
- 626

627 **Figures:**

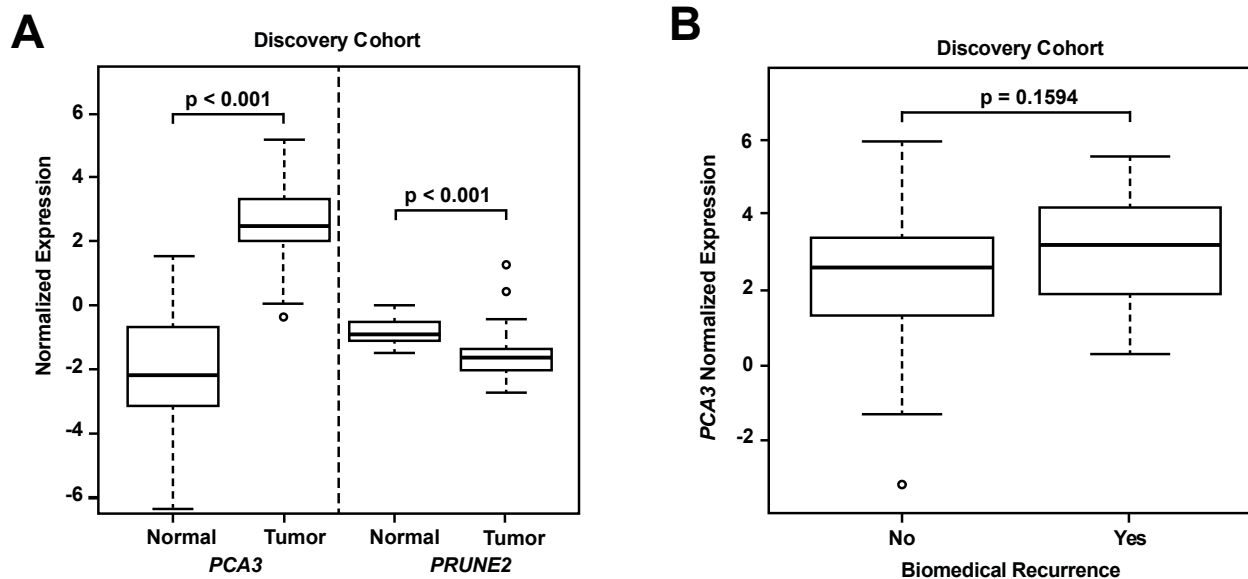

628

629

630 **Figure 1: Analyses of discovery prostate cancer cohort. (A)** *PRUNE2* and *PCA3* expression in

631 tumor (**Fig. 1 - Source Data File 1**) and nonneoplastic (**Fig. 1 - Source Data File 2**) prostatic

632 samples. Calculated values available in **Fig. 1 - Source Data File 3**. **(B)** Tumor *PCA3* expression

633 by biochemical recurrence status. *PCA3* expression in patients without versus with biochemical

634 recurrence in the discovery cohort. No significant difference in median expression was seen in

635 this cohort. Box plots of gene expression (normalized expression) in the discovery cohort. The

636 horizontal line within each box represents the median value, while the box represents the

637 interquartile range, and the whiskers extend out to 1.5 times the interquartile range. Outliers are

638 represented by circles. P-values are noted for the indicated comparisons.

639



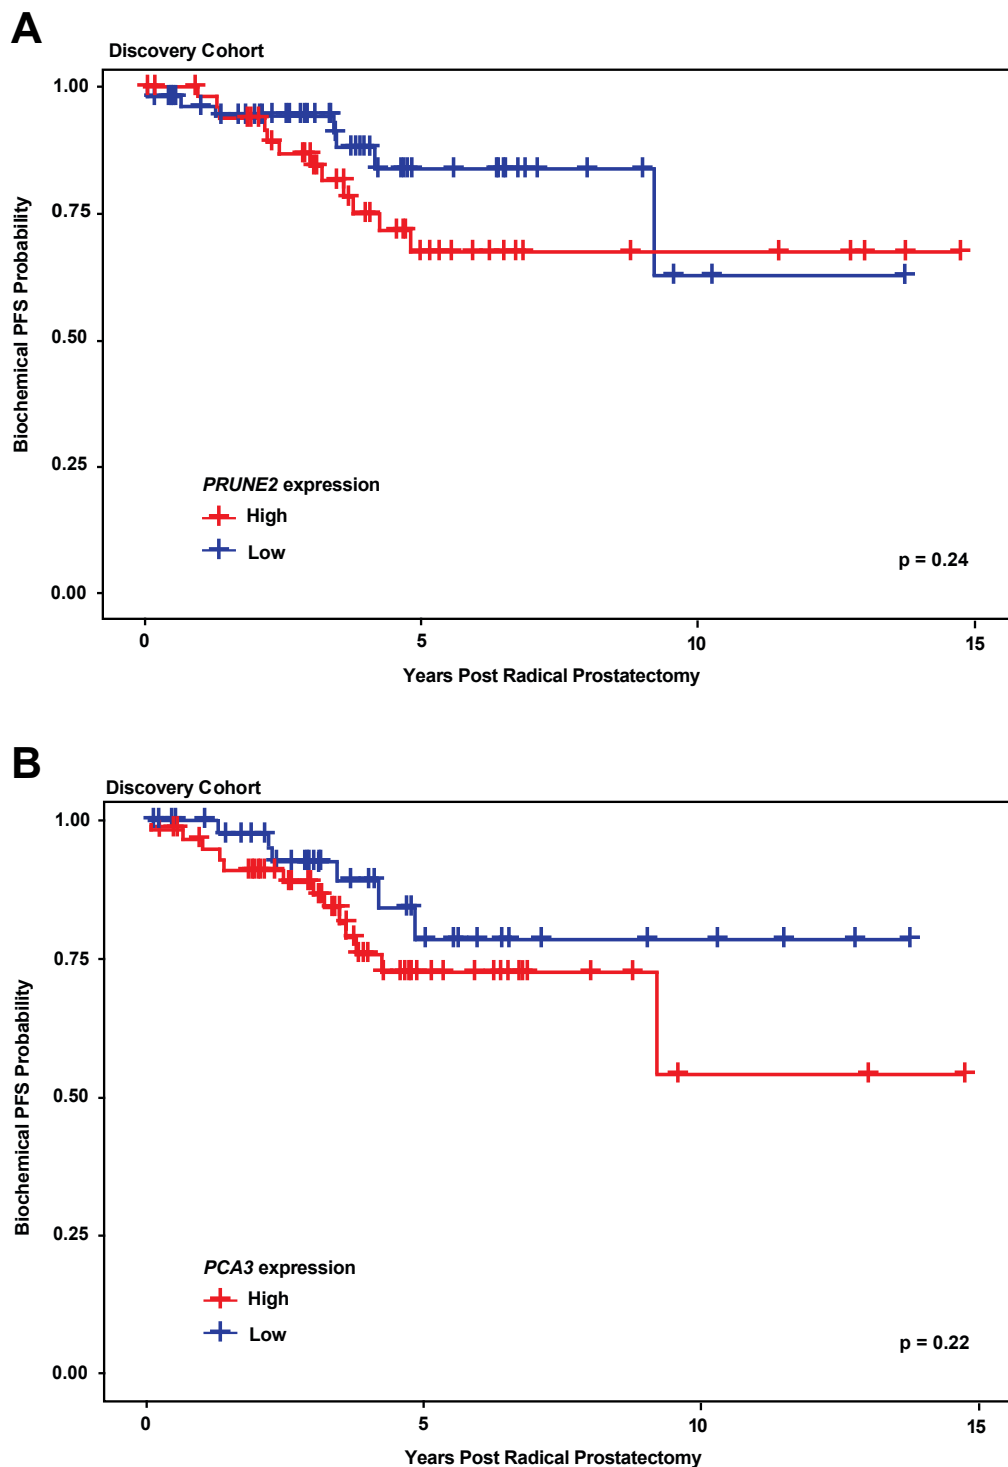

640

641 **Figure 2.** Kaplan-Meier curves illustrating time to event (biochemical recurrence) among  
642 patients post-prostatectomy from the discovery cohort, stratified by “high” gene expression  
643 (greater than mean expression, red line) versus “low” gene expression (less than or equal to mean  
644 expression, blue line), for (A) tumor *PRUNE2* expression, and (B) tumor *PCA3* expression.  
645 There is was no significant association of high versus low expression levels and time to  
646 recurrence by log rank testing for either *PRUNE2* or *PCA3*.

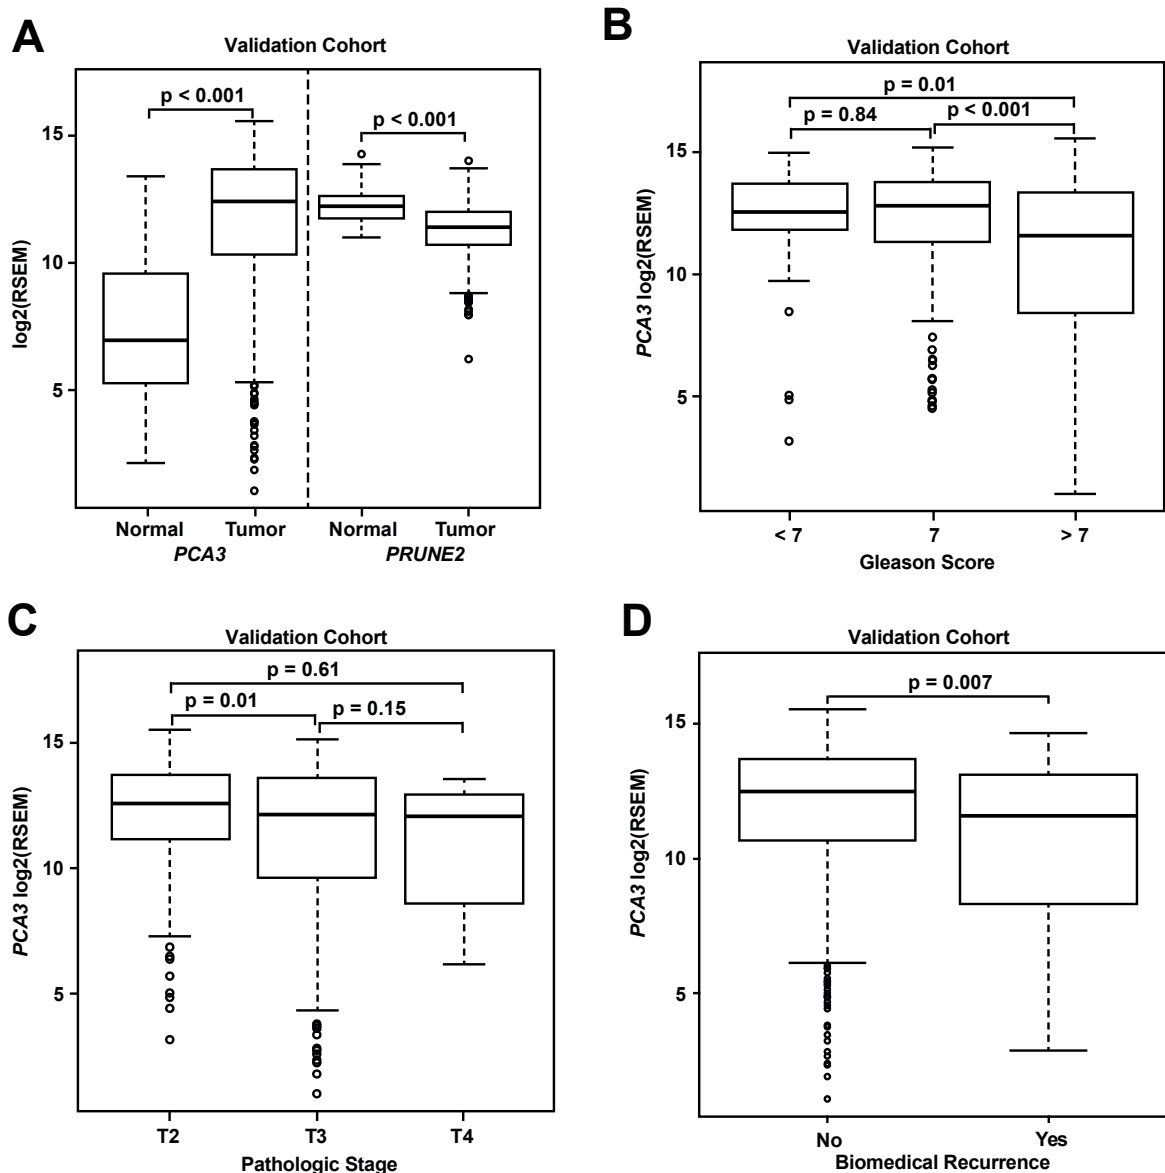

647

648 **Figure 3.** Analyses of TCGA prostate cancer validation cohort. (A) *PCA3* and *PRUNE2* expression in  
 649 nonneoplastic prostatic glandular tissue and in prostatic adenocarcinoma in the TCGA cohort illustrating  
 650 consistent gene expression differences between tumor and nonneoplastic prostate in both cohorts. (B, C)  
 651 *PCA3* expression in the cohort from TCGA across Gleason grades (B) showing lower expression in  
 652 higher grade (>7) tumors and across tumor stages (C) showing lower expression in higher stage tumors.  
 653 All illustrated tumor grades and stages show higher expression than nonneoplastic prostatic epithelium.  
 654 (D) *PCA3* expression in patients without versus with biochemical recurrence in the TCGA cohort. In the  
 655 TCGA cohort, lower *PCA3* median expression was associated with biochemical recurrence. Box plots of  
 656 gene expression in the TCGA cohort is reported as  $\log_2$ RSEM data. The horizontal line within each box  
 657 represents the median value, while the box represents the interquartile range, and the whiskers extend out  
 658 to 1.5 times the interquartile range. Outliers are represented by circles. P-values are noted for the  
 659 indicated comparisons. (RSEM: RNA-Seq by Expectation-Maximization).  
 660

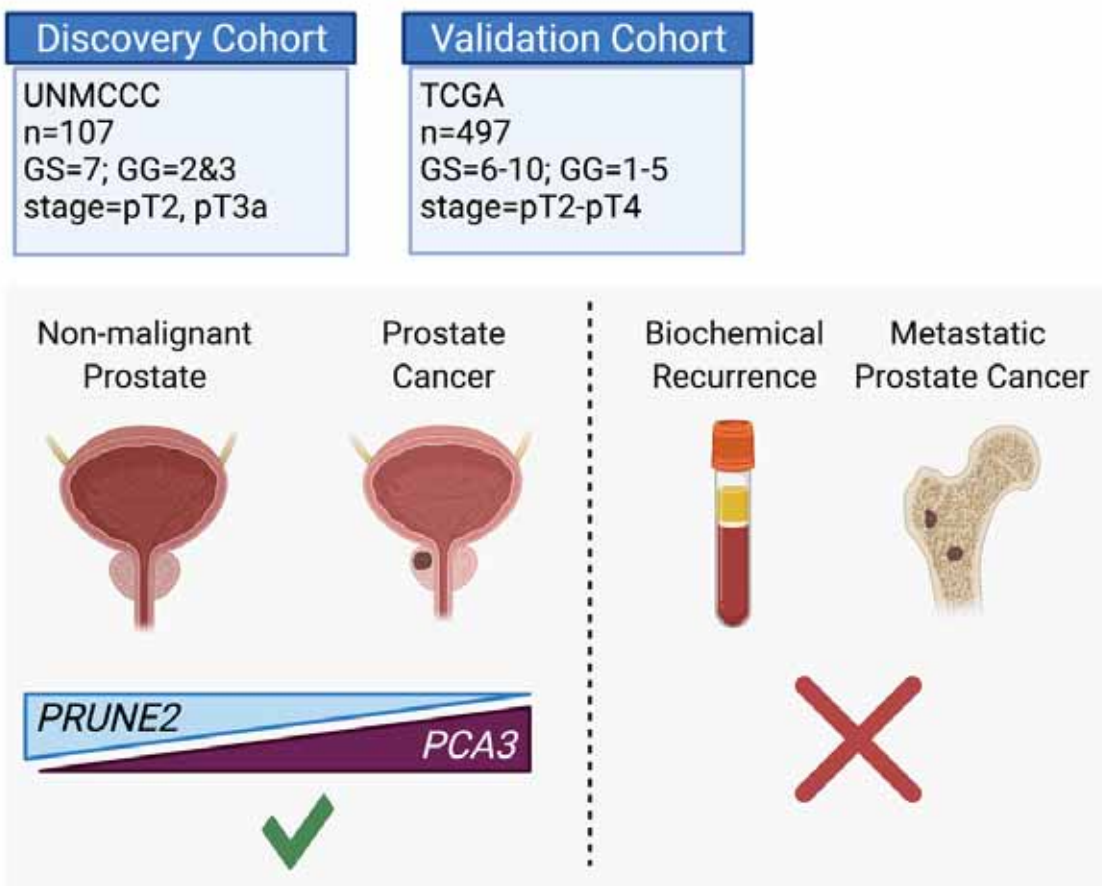

661  
662 **Figure 4. Graphical summary of the analyses.** *PCA3* and *PRUNE2* gene expression  
663 relationship in paired prostate cancer and adjacent normal prostate was analyzed in two  
664 independent retrospective cohorts of clinically-annotated cases post-radical prostatectomy: a  
665 single-institution discovery cohort (n=107) and a multi-institution validation cohort (n=497). We  
666 also serially examined clinical/pathological variables including time to disease recurrence.  
667 Created with BioRender.com  
668

669 **Tables:**

670 **Table 1.** Discovery Cohort: clinicopathologic features of the 107 patients in this study who had  
 671 radical prostatectomy at UNM for localized prostatic adenocarcinoma (Further details in **Table 1**  
 672 – **Source Data File 1** and **Table 1 – Supplemental Figure 1**)

| Variable                                              | Number | % or Mean (STD; Range) |
|-------------------------------------------------------|--------|------------------------|
| Age (years)                                           | 107    | 62.8 (8.4; 45-84)      |
| <b>Race</b>                                           |        |                        |
| Non-Hispanic White                                    | 91     | 85                     |
| Hispanic                                              | 8      | 7.5                    |
| American Indian                                       | 3      | 2.8                    |
| African American                                      | 3      | 2.8                    |
| Other                                                 | 2      | 1.9                    |
| <b>Post-prostatectomy Gleason Grade (Grade Group)</b> |        |                        |
| 3 + 4 = 7 (Grade Group 2)                             | 93     | 86.9                   |
| 4 + 3 = 7 (Grade Group 3)                             | 14     | 13.1                   |
| <b>Pathologic Stage</b>                               |        |                        |
| pT2                                                   | 80     | 74.8                   |
| pT3a                                                  | 27     | 25.2                   |
| <b>Biochemical Recurrence Status</b>                  |        |                        |
| No                                                    | 83     | 77.6                   |
| Yes                                                   | 19     | 17.8                   |
| LTF                                                   | 5      | 4.7                    |

673 Abbreviations: STD, standard deviation; LTF, lost to follow up

674

675

676

677 **Table 2.** Number of patients at risk over time (see **Figure 2A**)

678

|                          | Years Post Radical Prostatectomy |    |    |    | 679 |
|--------------------------|----------------------------------|----|----|----|-----|
| <i>PRUNE2</i> Expression | 0                                | 5  | 10 | 15 |     |
| High                     | 51                               | 15 | 5  | 0  | 680 |
| Low                      | 56                               | 14 | 2  | 0  | 681 |

682 **Table 3.** Number of patients at risk over time (see **Figure 2B**)

683

|                        | Years Post Radical Prostatectomy |    |    |    | 684 |
|------------------------|----------------------------------|----|----|----|-----|
| <i>PCA3</i> Expression | 0                                | 5  | 10 | 15 |     |
| High                   | 59                               | 16 | 2  | 0  |     |
| Low                    | 48                               | 13 | 5  | 0  |     |

685 **Table 4.** Validation cohort: clinicopathologic features of the 497 patients in the prostate cancer  
 686 TCGA data set, with a total of 549 tissue samples included.

| Variable                                       | Number | % or Mean (STD; Range) |
|------------------------------------------------|--------|------------------------|
| Age (years)                                    | 497    | 61 (6.8; 41-78)        |
| Vital Status                                   |        |                        |
| Alive                                          | 487    | 97.9                   |
| Dead                                           | 10     | 2.1                    |
| Sample Type                                    |        |                        |
| Primary tumor                                  | 497    |                        |
| Normal (non-malignant) prostate                | 52     |                        |
| Post-prostatectomy Gleason Grade (Grade Group) |        |                        |
| 6 (Grade Group 1)                              | 45     | 9                      |
| 7 (Grade Groups 2 & 3)                         | 247    | 49.7                   |
| 8 (Grade Group 4)                              | 64     | 12.9                   |
| 9 (Grade Group 5)                              | 137    | 27.6                   |
| 10 (Grade Group 5)                             | 4      | 0.8                    |
| Pathologic Stage                               |        |                        |
| pT2a                                           | 13     | 2.6                    |
| pT2b                                           | 10     | 2                      |
| pT2c                                           | 164    | 33                     |
| pT3a                                           | 158    | 32                     |
| pT3b                                           | 135    | 27                     |
| pT4                                            | 10     | 2                      |
| Unknown                                        | 7      | 1.4                    |
| Biochemical Recurrence Status                  |        |                        |
| No                                             | 371    | 74.6                   |
| Yes                                            | 58     | 11.7                   |
| Unknown                                        | 68     | 13.7                   |

687 Abbreviation: STD, standard deviation

688

689

690 **Source Data:**

691 **Table 1 - Source Data File 1. Discovery Cohort.** Clinicopathologic features of the 107 patients  
692 in this study who had radical prostatectomy at UNM for localized prostatic adenocarcinoma

693  
694 **Figure 1 - Source Data File 1. Analyses of discovery prostate cancer cohort.** Raw values of  
695 *PRUNE2* and *PCA3* expression in tumor prostatic samples.

696  
697 **Figure 1 - Source Data File 2. Analyses of discovery prostate cancer cohort.** Raw values of  
698 *PRUNE2* and *PCA3* expression in nonneoplastic prostatic samples.

699  
700 **Figure 1 - Source Data File 3. Analyses of discovery prostate cancer cohort.** Calculated  
701 values of *PRUNE2* and *PCA3* expression in tumor and nonneoplastic prostatic samples.

702  
703 **Source Code File. R code and SAS code of descriptive statistics.**  
704

705 **Supplemental Material:**

706 **Results**

707 In the discovery cohort, to further assess the association between time to biochemical recurrence  
708 and the gene expression of *PRUNE2* and *PCA3* and the ratio of their expressions, and to take into  
709 account possible confounding by clinicopathological variables, we performed multivariate Cox  
710 proportional hazards regression modeling (raw data available in Supplemental File 1 tables and  
711 code). As there may be possible correlations between tumor Gleason Grade (GG) and tumor  
712 pathologic stage (PS), we created a composite categorical variable (“GG-PS”) representing the  
713 four possibilities in the discovery cohort: 3+4/pT2, 4+3/pT2, 3+4/pT3a, 4+3/pT3a. We then used  
714 two approaches to model outcome.

715  
716 In the first approach, we fit four different Cox models. The explanatory variables in these models  
717 were as follows: model 1 (“GG\_PS model”) – GG\_PS only; model 2 (“*PRUNE2* model”) –  
718 *PRUNE2* expression, age, race, GG\_PS, and interaction between GG\_PS and *PRUNE2*  
719 expression; model 3 (“*PCA3* model”) – *PCA3* expression, age, race, GG\_PS, and interaction  
720 between GG\_PS and *PCA3* expression; and model 4 (“Ratio model”) – *PRUNE2/PCA3* ratio,  
721 age, race, GG\_PS, and interaction between GG\_PS and the ratio. The goodness-of-fit of the  
722 models were compared using the Akaike Information Criterion (AIC), and the results are  
723 summarized in **Supplemental Table S1**. As a lower value of AIC indicates a better association  
724 fit, the model comparison indicates that the model with GG\_PS only (model 1) represents the  
725 best fit for the data, and does not suggest that the expression of *PRUNE2*, *PCA3* or their ratio  
726 adds to the ability of pathology grade and stage to predict biochemical recurrence.

727

728 As a second multivariable approach to an assessment of the association of time to biochemical  
729 recurrence and gene expression, we created a multivariable model, including the following  
730 variables: expression of *PRUNE2*, expression of *PCA3*, age, race, the composite variable  
731 GG\_PS, interaction between *PRUNE2* expression and GG\_PS, and interaction between *PCA3*  
732 expression and GG\_PS. In this case, a stepwise selection algorithm was used for model selection,  
733 and only the model with Gleason score and pathologic stage (GG\_PS) was selected, as none of  
734 the other variables had a p-value less than the specified significance level of 0.25 (data not  
735 shown).

736  
737 In the TCGA cohort, we used Cox proportional hazards modeling to assess the association of  
738 tumor *PCA3* expression, adjusting for tumor grade, tumor stage, and age at diagnosis. The results  
739 are summarized in **Supplemental Table S2**. Briefly, on multivariable modeling, there was an  
740 association between tumor grade and stage with recurrence, we did not find that tumor *PCA3*  
741 expression was associated with biochemical recurrence [HR, 0.96; 95% CI 0.87-1.04, (p-  
742 value=0.36)].

743

## 744 **Methods**

745 *Statistical Analysis for Quantifying the expression of PCA3 and PRUNE2.* There were  
746 combinations of assays and control genes used for quantifying the expression of *PCA3* and  
747 *PRUNE2* in this study. Explicitly, there were 9 duplex mixes for *PRUNE2*: PR1C1, PR1C2,  
748 PR1C3, PR2C1, PR2C2, PR2C3, PR3C1, PR3C2, PR3C3; and 6 duplex mixes for *PCA3*:  
749 PC1C1, PC1C2, PC1C3, PC2C1, PC2C2, PC3C3, where the first 3 letters denote an assay and  
750 last two letters denote a control gene being used in a particular run. For example, PC2C2 denotes



751 the second assay for *PCA3* (Hs03462121\_m1, detailed in Methods) and the second endogenous  
752 control gene (Hs02800695\_m1, detailed in Methods) were used for that specific experiment.

753  $C_{T0}$  is to denote the logarithmic number of PCR cycle when the fluorescent signal passes a  
754 threshold value. Let  $\Delta C_{T0} = C_{T0} \text{ study gene} - C_{T0} \text{ control gene}$  and we had  $-\Delta C_{T0}$  to quantify the  
755 gene expression (relative to a control gene), resulting in a positive value meaning an upregulated  
756 gene's expression.

757 The experiment was completed 3 times for each gene duplex mix, e.g. we have three data points  
758 of PC2C2 measure for a tumor sample. The median of the three  $-\Delta C_{T0}$  values is summarized to  
759 estimate the gene expression of a particular gene duplex mix. We then looked at both mean and  
760 median of 9 estimates for *PRUNE2* and 6 estimates for *PCA3*, separately (data not shown). We  
761 did not see any significant difference utilizing mean or median in this or subsequent analyses.

762

### 763 **Supplemental Tables:**

#### 764 **Supplemental Table S1.** Discovery cohort multivariable model

| Model               | Akaike Information Criterion Score |
|---------------------|------------------------------------|
| PS_GG model         | 157.2                              |
| <i>PRUNE2</i> model | 162.9                              |
| <i>PCA3</i> model   | 166.2                              |
| Ratio model         | 162.2                              |

765

766

#### 767 **Supplemental Table S2.** Validation cohort multivariable cox model

|                     | Hazard Ratio (HR) | 95% CI        | p-value |
|---------------------|-------------------|---------------|---------|
| <i>PCA3</i>         | 0.963             | 0.888 – 1.044 | 0.36    |
| Gleason Grade       | 1.558             | 1.147 – 2.117 | <0.01   |
| Pathologic Stage T3 | 3.596             | 1.360 – 9.512 | <0.01   |
| Pathologic Stage T4 | 1.860             | 0.206 – 16.82 | 0.58    |
| Age at Diagnosis    | 1.000             | 0.960 – 1.043 | 0.99    |

768

769 **Supplemental Figures:**

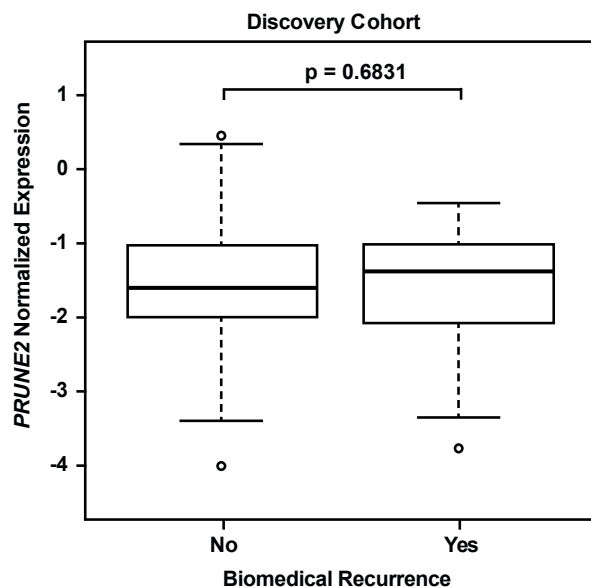

770

771 **Supplemental Figure S1:** Discovery cohort - no significant difference in tumor *PRUNE2*  
772 expression by biochemical recurrence status.

773

774

775

776

777

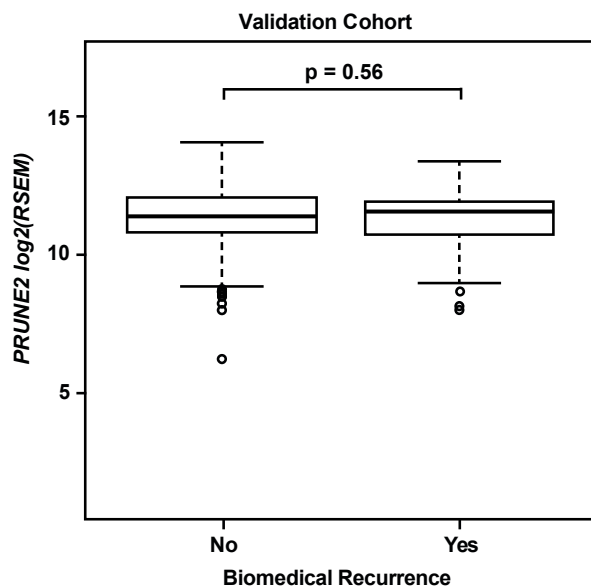

778

779

780 **Supplemental Figure S2:** Validation Cohort – no significant difference in tumor *PRUNE2*  
781 expression by biochemical recurrence status

782

783

784

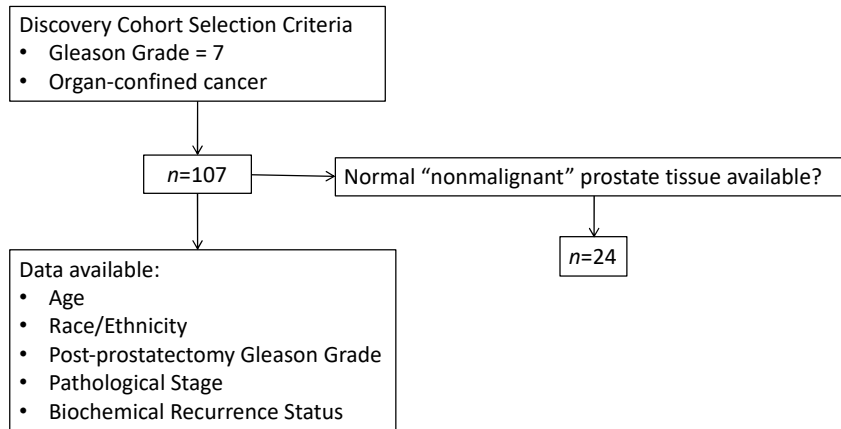

785

786 **Table 1 - Supplemental Figure 1:** Flow diagram of Discovery Cohort selection criteria and  
787 clinicopathological characteristics available.

788
